# Supplementary material
Source: publisher figshare collection journal article supplement (https://gsajournals.figshare.com/ndownloader/files/25833989)
Supplement: Supplementary file 1 [file 25833989]

## Sheet: Sheet1
Chromsome	Canu Contig	Number of CENP-A repeats	Length of Centromereic repeat	Reference Mapping Position Start	Reference Mapping End	Number of contigs mapped to chromosome
chr1	tig00011425	673	125068	20330007	20344665	4
chr1	tig00012069	191	35242	20349384	20373945	4
chr1	tig00011426	105	19433	20330007	20344665	4
chr1	tig00011613	217	40314	20349384	23555136	4
chr2	tig00338218	49	9112	1382980	2018170	3
chr2	tig00002506	209	19158	1404703	1382980	3
chr2	tig00011573	209	38688	1365316	1	3
chr3	tig00004935	227	42216	3171127	4371448	1
chr4	tig00011984	404	74987	23463056	23491962	4
chr4	tig00001781	11	1978	23587452	19113267	4
chr4	tig00004999	95	17544	23419682	23492033	4
chr4	tig00001745	198	36800	23650073	24380549	4
chr5	tig00338208	282	52204	4355227	2958324	2
chr5	tig000011885	1	99	729422	1164470	2
chr6	tig00011518	69	12701	2484257	12090137	1
chr7	tig00012116	299	55531	13450517	13006453	2
chr7	tig00012117	137	25342	11262729	10893674	2
chr8	tig00002052	330	61261	764353	2020	3
chr8	tig00011746	166	30839	1163254	1168568	3
chr8	tig00011738	138	25581	2046975	1196712	3
chr9	tig00011488	251	46505	2704894	7344832	2
chr9	tig00000470	276	50917	4300648	4313026	2
chr10	tig00003592	179	33174	914636	963245	2
chr10	tig00011753	139	25854	1706184	2072706	2
chr11	tig00000321	210	38930	5623209	116993	1
chr12	tig00011762	142	26309	18648585	19239140	2
chr12	tig00001956	10	1771	18648585	18686676	2
chr13	tig00011591	144	26784	1469110	1023690	1
chr14	tig00011408	109	20143	9853967	13471052	2
chr14	tig00011404	326	60536	14265906	13486982	2
chr15	tig00011512	118	21922	14673632	14706461	2
chr15	tig00000963	140	26036	14707625	16775386	2
chr16	tig00011729	191	35493	2659	227322	1
chr17	tig00000446	114	21004	16034162	12459277	6
chr17	tig00000457	9	1599	12041678	12118451	6
chr17	tig00001302	184	34100	8722988	8724973	6
chr17	tig00000410	1	96	11732576	12035600	6
chr17	tig00000441	1	93	11950215	12028318	6
chr17	tig00338209	19	3508	8723730	8724930	6
chr18	tig00011432	241	44699	3167991	4806520	3
chr18	tig00011434	145	26788	4815761	5315218	3
chr18	tig00000447	72	13271	5624680	4806501	3
chr19	tig00001319	126	23427	4191152	4688796	2
chr19	tig00338283	59	10959	3977897	3800703	2
chr20	tig00011587	379	70466	18668298	18692718	3
chr20	tig00011646	120	22288	18666314	17319069	3
chr20	tig00011586	50	9207	19474157	18668298	3
chr21	tig00011597	181	33014	1543655	4418550	1
